# Supplementary material for: 3D Stretchable Arch Ribbon Array Fabricated via Grayscale Lithography
Source: PubMed Central journal article supplement (PMC4921820; doi:10.1038/srep28552), 2016-06-27
Supplement: srep28552-s1.pdf [file srep28552-s1.pdf]

# 3D Stretchable Arch Ribbon Array Fabricated via Grayscale Lithography

*Yu Pang<sup>1+</sup>, Yi Shu<sup>1+</sup>, Mohammad Shavezipur<sup>2,3+</sup>, Xuefeng Wang<sup>1</sup>, Mohammad Ali Mohammad<sup>1</sup>, Yi Yang<sup>1</sup>, Haiming Zhao<sup>1</sup>, Ningqin Deng<sup>1</sup>, Roya Maboudian<sup>3</sup>, and Tian-Ling Ren<sup>1\*</sup>*

<sup>1</sup>Institute of Microelectronics, Tsinghua University, 100084, Beijing, China

<sup>2</sup>Department of Mechanical Engineering, Southern Illinois University, Edwardsville, IL 62026, USA

<sup>3</sup>Department of Chemical and Biomolecular Engineering, University of California, Berkeley, CA 94720, USA

\* corresponding author: RenTL@tsinghua.edu.cn

<sup>+</sup>These authors contribute equally to this work

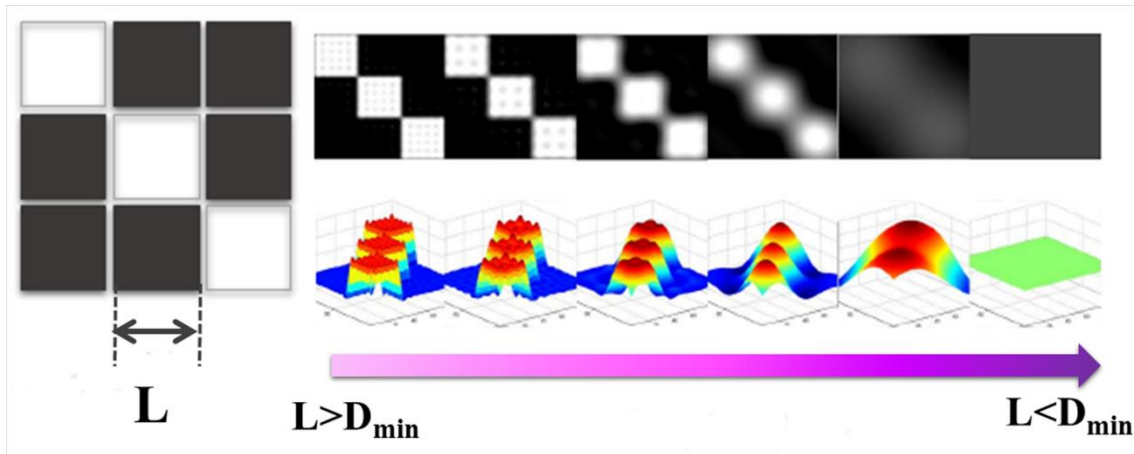

**Figure S1.** A  $3 \times 3$  matrix unit with nine square pixels, and optical images of the matrix unit shows that the object information has been gradually lost with decreasing  $L$  size. The simulation results corresponding to each condition have also been displayed.

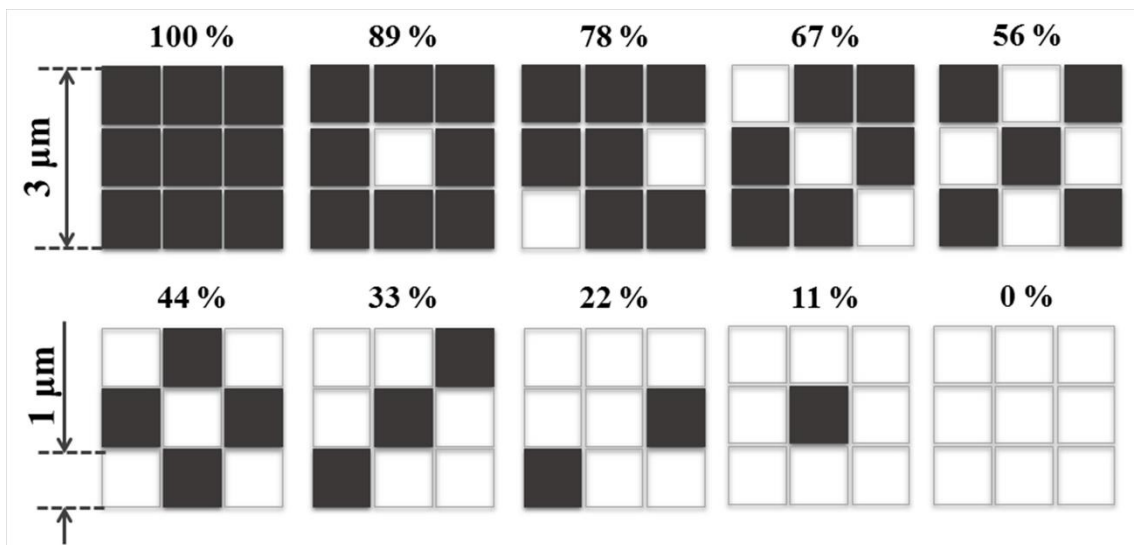

**Figure S2.** Ten grey levels design: a  $3 \times 3$  matrix unit with a gradient transmittance value of 11 %.

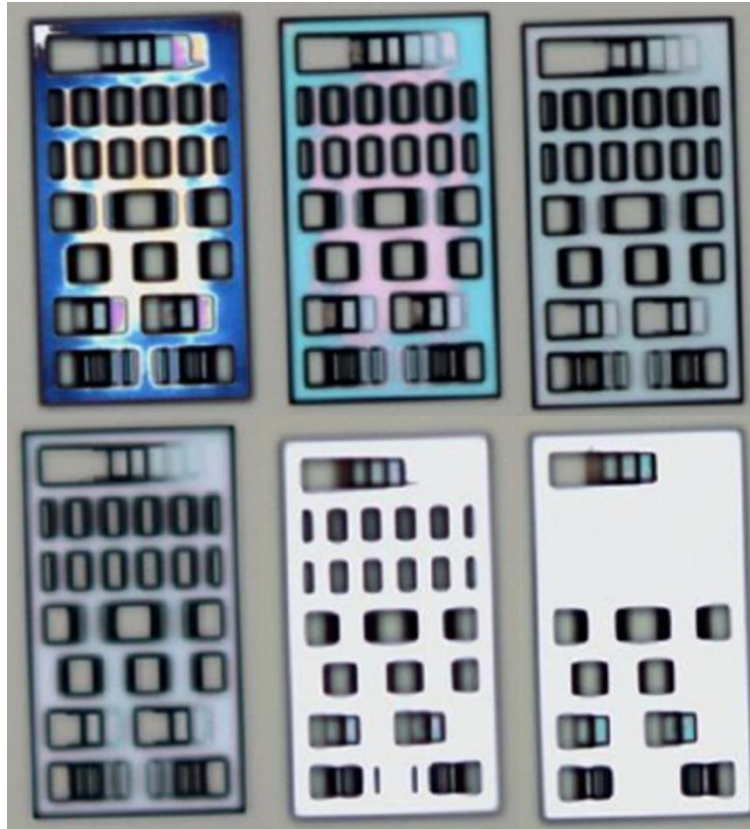

**Figure S3.** Optical image after developing at different exposure dose of 220, 240, 260, 280, 300, and 320  $\text{mJ}/\text{cm}^2$  from upper right to lower left.

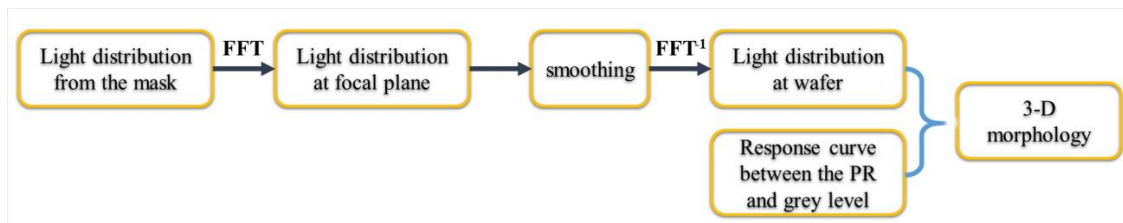

**Figure S4.** The main process of simulated morphology after developing.

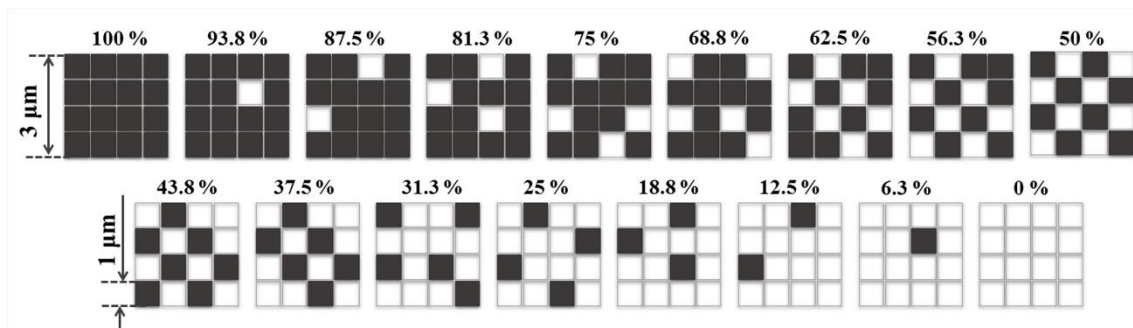

**Figure S5.** The seventeen grey levels design: a  $4 \times 4$  matrix unit with a gradient transmittance value of about 6.3 %.

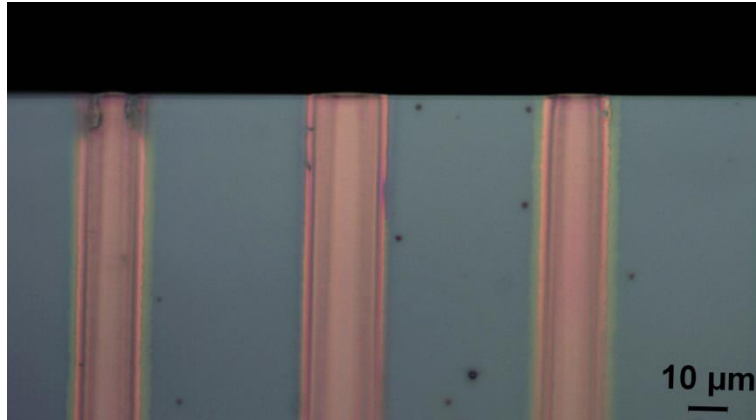

**Figure S6.** The optical micrograph of the pipe-like silicon dioxide developed after the first lithography.

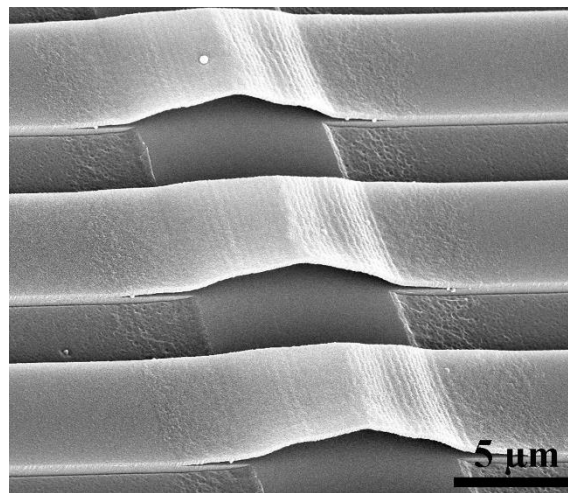

**Figure S7.** The SEM image of arch ribbon structure after the 30 min treatment of oxygen plasma.

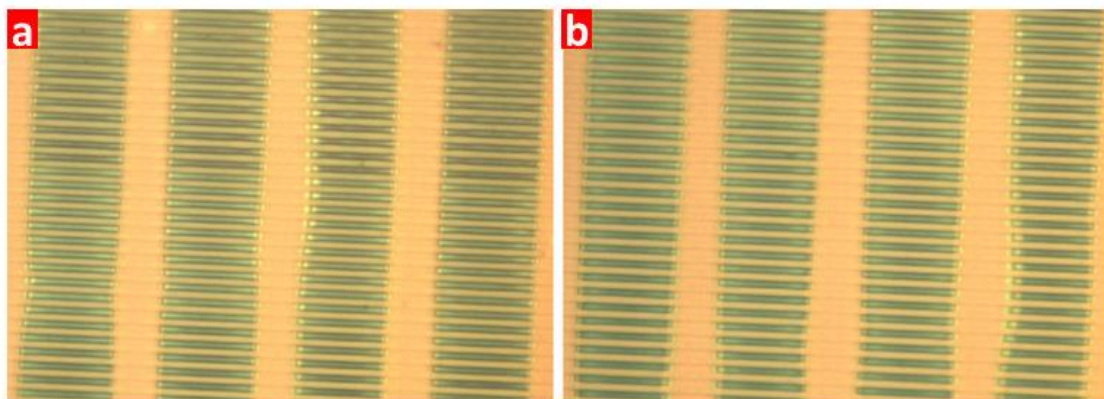

**Figure S8.** The optical images of the arch ribbon array (a) before, and (b) after heat treatment.
